# Supplementary material for: Transcription factor ATF4 directs basal and stress-induced gene expression in the unfolded protein response and cholesterol metabolism in the liver
Source: PubMed Central journal article supplement — Mol Biol Cell. 2016 May 1;27(9):1536–51. doi: 10.1091/mbc.E16-01-0039 (PMC4850040; doi:10.1091/mbc.e16-01-0039), 2016-05-01
Supplement: supp_E16-01-0039v1_CombinedSupMats.pdf [file supp_E16-01-0039v1_CombinedSupMats.pdf]

# Supplemental Materials

*Molecular Biology of the Cell*

Fusakio et al.

## Supplementary Information

Transcription factor ATF4 directs basal and select induced gene expression in the unfolded protein response and cholesterol metabolism in liver

**Running title:** ATF4 in the unfolded protein response

Michael E. Fusakio<sup>a</sup>, Jeffrey A. Willy<sup>a</sup>, Yongping Wang<sup>b</sup>, Emily T. Mirek<sup>b</sup>, Rana J.T. Al Baghdadi<sup>b</sup>, Christopher M. Adams<sup>c</sup>, Tracy G. Anthony<sup>b\*</sup>, Ronald C. Wek<sup>a\*</sup>

Supplemental Table 1: qPCR primers used in this study.

### Supplemental Table 1: qRT-PCR primers used in this study

| Name    | Forward               | Reverse                |
|---------|-----------------------|------------------------|
| Abca1   | AACAGTTTGTGGCCCTTTTG  | AGTTCAGGCTGGGGTACTT    |
| Abcg5   | CGTCCAGAACAACACGCTAA  | GCAGCATCTGCCACTTATGA   |
| Abcg8   | AAGACGGGCTGTACACTGCT  | AGGAGGACATGTGGAAGGTG   |
| Actin   | TGTTACCAACTGGGACGACA  | GGGGTGTGAAGGTCTCAAA    |
| ASNS    | TTGACCCGCTGTTTGAATG   | CGCCTTGTGGTTGTAGATTCAC |
| ATF4    | GCCGGTTTAAAGTTGTGTGCT | CTGGATTCGAGGAATGTGCT   |
| ATF5    | GGCTGGCTCGTAGACTATGG  | CCAGAGGAAGGAGAGCTGTG   |
| ATF6    | GATGCAGCACATGAGGCTTA  | CAGGAACGTGCTGAGTTGAA   |
| BiP     | TGCAGCAGGACATCAAGTTC  | TACGCCTCAGCAGTCTCCTT   |
| CHOP    | CGGAACCTGAGGAGAGAGTG  | CGTTTCCTGGGGATGAGATA   |
| Cth     | TGCTAAGGCCTTCCTCAAAA  | AAGCTCGATCCAGGTCTTCA   |
| Cyp7a1  | ACACCATTCTGCAACCTTC   | GCTGTCCGATATTCAAGGA    |
| Cyp27a1 | TCTGGCTACCTGCACTTCCT  | CTGGATCTCTGGGCTCTTTG   |
| FGF21   | AGATGGGCTCTCTATGGATCG | GGGCTTCAGACTGGTACACAT  |
| Gadd34  | AGGACCCCGAGATTCCTCTA  | CCTGGAATCAGGGGTAAGGT   |
| HNF4a   | GGTCAAGCTACGAGGACAGC  | ATCCAGAAGGAGTTCGCAGA   |
| nCEH1   | TTCTGGAGACAGTGCTGGTG  | GGATCGGAGTGTTTCATGCTT  |
| Soat2   | GTGCTGGGATCTTTTGTGT   | GGATGAAGCAGGCATAGAGC   |
| Sod2    | CCGAGGAGAAGTACCACGAG  | GCTTGATAGCCTCCAGCAAC   |
| XBP1t   | AAGAACACGCTTGGGAATGG  | ACTCCCCTTGGCCTCCAC     |
| XPB1s   | GAGTCCGCAGCAGGTG      | GTGTCAGAGTCCATGGGA     |
